# Supplementary material for: Strong antiferromagnetic interaction in a 3D copper–organic framework and spin-glass-like behaviour in a 1D nickel compound
Source: Royal Society of Chemistry journal article supplement (doi:10.1039/c4ra02942a), 2014-01-01
Supplement: c4ra02942a1.pdf [file c4ra02942a1.pdf]

# Strong Antiferromagnetic Interaction in a 3D Copper-Organic Framework and Spin-glass-like Behaviour in a 1D Nickel Compound

Sheng-Yun Liao<sup>a</sup>, Wen Gu<sup>a,b</sup>, Jin-Lei Tian<sup>a</sup>, Tian-Hao Li<sup>a</sup>, Lin-Yan Yang<sup>a</sup>, Xin Liu<sup>a,b\*</sup>

<sup>a</sup>Department of Chemistry, Nankai University, Tianjin, China 300071

<sup>b</sup>Tianjin Key Laboratory of Metal and Molecule Based Material Chemistry, Tianjin, China 300071

\* Fax: +86-22-23502779. Tel: +86-22-23505020. E-mail: liuxin64@nankai.edu.cn.

## Contents

|                                                                        |          |
|------------------------------------------------------------------------|----------|
| <b>NMR spectra of ligand .....</b>                                     | <b>2</b> |
| <b>Selected bond distances and angles.....</b>                         | <b>3</b> |
| <b>XRD patterns of 1 and 2 .....</b>                                   | <b>5</b> |
| <b>Temperature dependence of ac susceptibility of 2 .....</b>          | <b>5</b> |
| <b>Field dependence of magnetization and the hysteresis loop .....</b> | <b>6</b> |

## NMR spectra of ligand

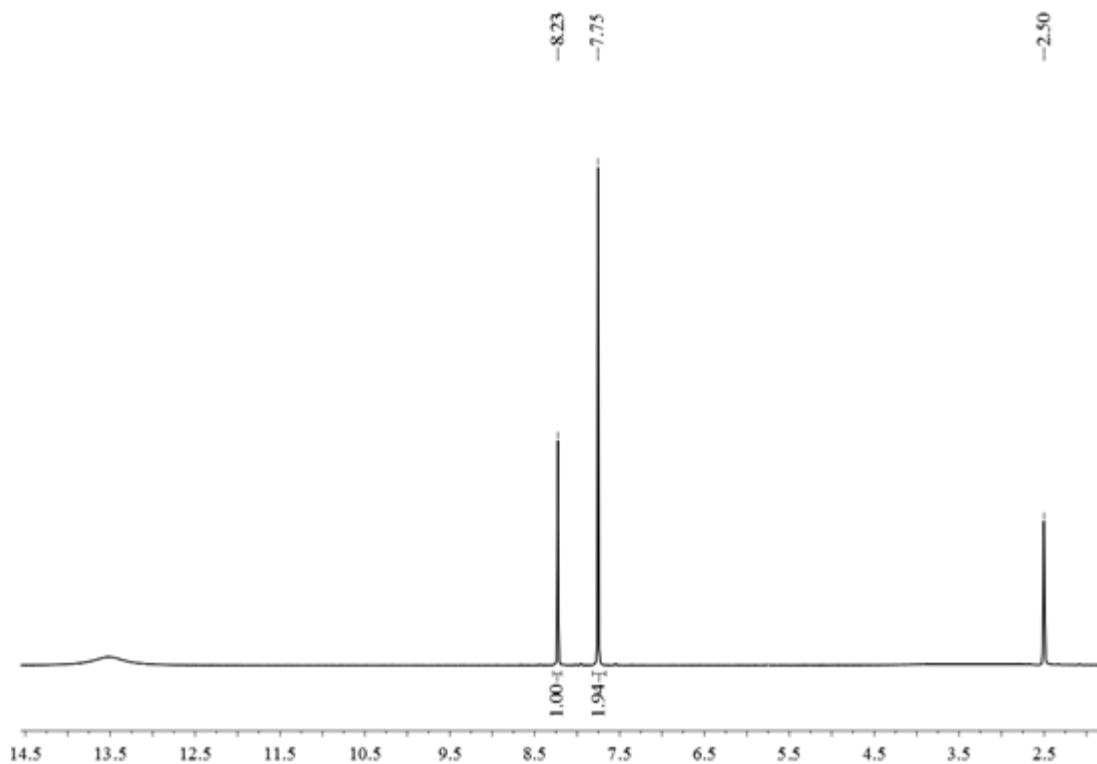

Fig. S1 <sup>1</sup>H NMR spectrum (400 Hz) of 5-azidoisophthalic acid in DMSO-d<sub>6</sub>.

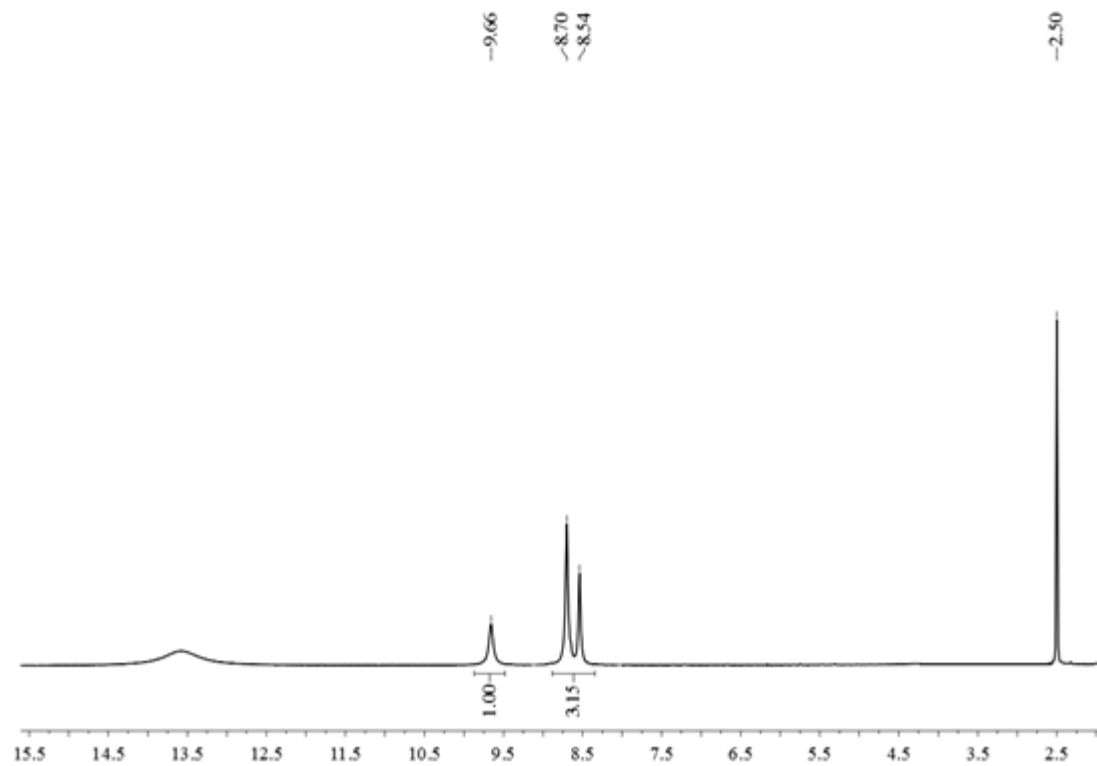

Fig. S2 <sup>1</sup>H NMR spectrum (400 Hz) of H<sub>3</sub>ctia in DMSO-d<sub>6</sub>

## Selected bond distances and angles

**Table S1.** Selected Bond Distances (Å) and Angles (deg) for **1**

| bonds (Å) and angles (deg) |            |                      |            |
|----------------------------|------------|----------------------|------------|
| Cu(1)-O(14)                | 1.941(4)   | O(2)-Cu(1)-N(3)#2    | 100.85(16) |
| Cu(1)-O(6)                 | 1.954(4)   | O(1)-Cu(2)-O(9)#1    | 168.88(16) |
| Cu(1)-O(10)#1              | 1.955(4)   | O(1)-Cu(2)-O(5)      | 86.32(18)  |
| Cu(1)-O(2)                 | 2.019(4)   | O(9)#1-Cu(2)-O(5)    | 90.41(17)  |
| Cu(1)-N(3)#2               | 2.147(4)   | O(1)-Cu(2)-O(13)     | 86.09(18)  |
| Cu(2)-O(1)                 | 1.929(4)   | O(9)#1-Cu(2)-O(13)   | 94.95(17)  |
| Cu(2)-O(9)#1               | 1.933(4)   | O(5)-Cu(2)-O(13)     | 166.58(16) |
| Cu(2)-O(5)                 | 1.981(4)   | O(1)-Cu(2)-N(12)#3   | 92.66(16)  |
| Cu(2)-O(13)                | 1.980(4)   | O(9)#1-Cu(2)-N(12)#3 | 98.36(16)  |
| Cu(2)-N(12)#3              | 2.168(4)   | O(5)-Cu(2)-N(12)#3   | 99.24(17)  |
| Cu(3)-O(12)                | 1.906(4)   | O(13)-Cu(2)-N(12)#3  | 92.15(17)  |
| Cu(3)-O(16)                | 1.924(4)   | O(12)-Cu(3)-O(16)    | 177.01(17) |
| Cu(3)-O(18)                | 1.980(5)   | O(12)-Cu(3)-O(18)    | 88.00(19)  |
| Cu(3)-N(9)                 | 2.083(5)   | O(16)-Cu(3)-O(18)    | 94.8(2)    |
| Cu(3)-O(17)                | 2.158(6)   | O(12)-Cu(3)-N(9)     | 90.52(18)  |
| Cu(4)-O(19)                | 1.910(5)   | O(16)-Cu(3)-N(9)     | 86.99(18)  |
| Cu(4)-O(8)                 | 1.926(4)   | O(18)-Cu(3)-N(9)     | 127.3(3)   |
| Cu(4)-O(4)                 | 1.932(4)   | O(12)-Cu(3)-O(17)    | 90.7(2)    |
| Cu(4)-N(6)#4               | 2.010(5)   | O(16)-Cu(3)-O(17)    | 89.3(2)    |
| O(14)-Cu(1)-O(6)           | 168.67(16) | O(18)-Cu(3)-O(17)    | 108.5(4)   |
| O(14)-Cu(1)-O(10)#1        | 90.53(18)  | N(9)-Cu(3)-O(17)     | 124.2(3)   |
| O(6)-Cu(1)-O(10)#1         | 89.51(17)  | O(19)-Cu(4)-O(8)     | 94.5(2)    |
| O(14)-Cu(1)-O(2)           | 89.64(18)  | O(19)-Cu(4)-O(4)     | 86.4(2)    |
| O(6)-Cu(1)-O(2)            | 87.80(17)  | O(8)-Cu(4)-O(4)      | 177.1(2)   |
| O(10)#1-Cu(1)-O(2)         | 167.02(16) | O(19)-Cu(4)-N(6)#4   | 177.4(2)   |
| O(14)-Cu(1)-N(3)#2         | 89.63(17)  | O(8)-Cu(4)-N(6)#4    | 88.11(18)  |
| O(6)-Cu(1)-N(3)#2          | 101.69(17) | O(4)-Cu(4)-N(6)#4    | 91.02(18)  |
| O(10)#1-Cu(1)-N(3)#2       | 92.13(16)  |                      |            |

Symmetry transformations used to generate equivalent atoms: #1 x, y-1, z; #2 -x, -y+1, -z; #3 -x+1, -y+2, -z+1; #4 x-1, y, z; #5 x, y+1, z; #6 x+1, y, z; #7 x+1, y+1, z; #8 x-1, y-1, .z.

**Table S2.** Selected Bond Distances (Å) and Angles (deg) for **2**

| bonds (Å) and angles (deg) |            |                       |            |
|----------------------------|------------|-----------------------|------------|
| Ni(1)-O(1)#1               | 2.026(3)   | O(7)#1-Ni(1)-O(7)     | 180.000(1) |
| Ni(1)-O(1)                 | 2.026(3)   | N(3)#2-Ni(2)-N(3)     | 180.0(2)   |
| Ni(1)-O(8)                 | 2.045(3)   | N(3)#2-Ni(2)-O(6)     | 100.07(13) |
| Ni(1)-O(8)#1               | 2.045(3)   | N(3)-Ni(2)-O(6)       | 79.93(13)  |
| Ni(1)-O(7)#1               | 2.099(4)   | N(3)#2-Ni(2)-O(6)#2   | 79.93(13)  |
| Ni(1)-O(7)                 | 2.099(4)   | N(3)-Ni(2)-O(6)#2     | 100.07(13) |
| Ni(2)-N(3)#2               | 2.011(4)   | O(6)-Ni(2)-O(6)#2     | 180.0      |
| Ni(2)-N(3)                 | 2.011(4)   | N(3)#2-Ni(2)-O(9)     | 91.03(14)  |
| Ni(2)-O(6)                 | 2.076(3)   | N(3)-Ni(2)-O(9)       | 88.97(14)  |
| Ni(2)-O(6)#2               | 2.076(3)   | O(6)-Ni(2)-O(9)       | 89.27(12)  |
| Ni(2)-O(9)                 | 2.117(3)   | O(6)#2-Ni(2)-O(9)     | 90.73(12)  |
| Ni(2)-O(9)#2               | 2.117(3)   | N(3)#2-Ni(2)-O(9)#2   | 88.97(14)  |
| Ni(3)-O(11)#3              | 2.016(3)   | N(3)-Ni(2)-O(9)#2     | 91.03(14)  |
| Ni(3)-O(11)                | 2.016(3)   | O(6)-Ni(2)-O(9)#2     | 90.73(12)  |
| Ni(3)-O(10)                | 2.028(4)   | O(6)#2-Ni(2)-O(9)#2   | 89.27(12)  |
| Ni(3)-O(10)#3              | 2.028(4)   | O(9)-Ni(2)-O(9)#2     | 180.00(18) |
| Ni(3)-O(12)                | 2.056(4)   | O(11)#3-Ni(3)-O(11)   | 180.0(3)   |
| Ni(3)-O(12)#3              | 2.056(4)   | O(11)#3-Ni(3)-O(10)   | 87.21(16)  |
| O(1)#1-Ni(1)-O(1)          | 180.000(1) | O(11)-Ni(3)-O(10)     | 92.79(16)  |
| O(1)#1-Ni(1)-O(8)          | 91.35(13)  | O(11)#3-Ni(3)-O(10)#3 | 92.79(16)  |
| O(1)-Ni(1)-O(8)            | 88.65(13)  | O(11)-Ni(3)-O(10)#3   | 87.21(16)  |
| O(1)#1-Ni(1)-O(8)#1        | 88.65(13)  | O(10)-Ni(3)-O(10)#3   | 180.000(1) |
| O(1)-Ni(1)-O(8)#1          | 91.35(13)  | O(11)#3-Ni(3)-O(12)   | 89.82(15)  |
| O(8)-Ni(1)-O(8)#1          | 180.000(1) | O(11)-Ni(3)-O(12)     | 90.18(15)  |
| O(1)#1-Ni(1)-O(7)#1        | 93.44(14)  | O(10)-Ni(3)-O(12)     | 88.40(17)  |
| O(1)-Ni(1)-O(7)#1          | 86.56(14)  | O(10)#3-Ni(3)-O(12)   | 91.60(17)  |
| O(8)-Ni(1)-O(7)#1          | 86.63(17)  | O(11)#3-Ni(3)-O(12)#3 | 90.18(15)  |
| O(8)#1-Ni(1)-O(7)#1        | 93.37(17)  | O(11)-Ni(3)-O(12)#3   | 89.82(15)  |
| O(1)#1-Ni(1)-O(7)          | 86.56(14)  | O(10)-Ni(3)-O(12)#3   | 91.60(17)  |
| O(1)-Ni(1)-O(7)            | 93.44(14)  | O(10)#3-Ni(3)-O(12)#3 | 88.40(17)  |
| O(8)-Ni(1)-O(7)            | 93.37(17)  | O(12)-Ni(3)-O(12)#3   | 180.00(16) |
| O(8)#1-Ni(1)-O(7)          | 86.63(17)  |                       |            |

Symmetry transformations used to generate equivalent atoms: #1 -x+1, -y+2, -z+1; #2 -x+1, -y+1, -z; #3 -x, -y+2, -z+2.

## XRD patterns of 1 and 2

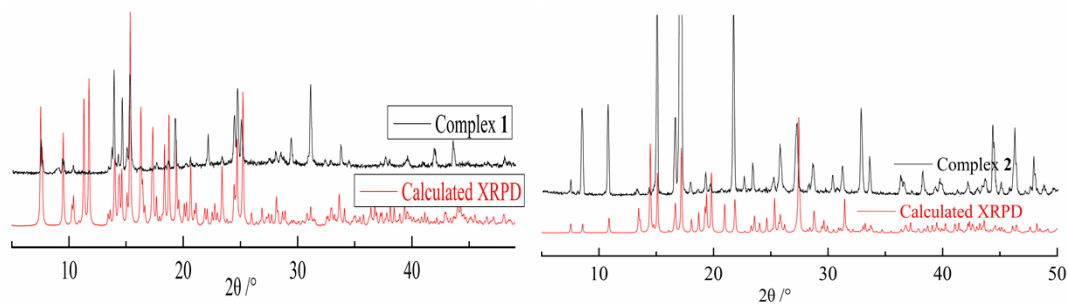

Fig. S3 XRD patterns of 1 and 2 compared with a simulated pattern.

## Temperature dependence of ac susceptibility of 2

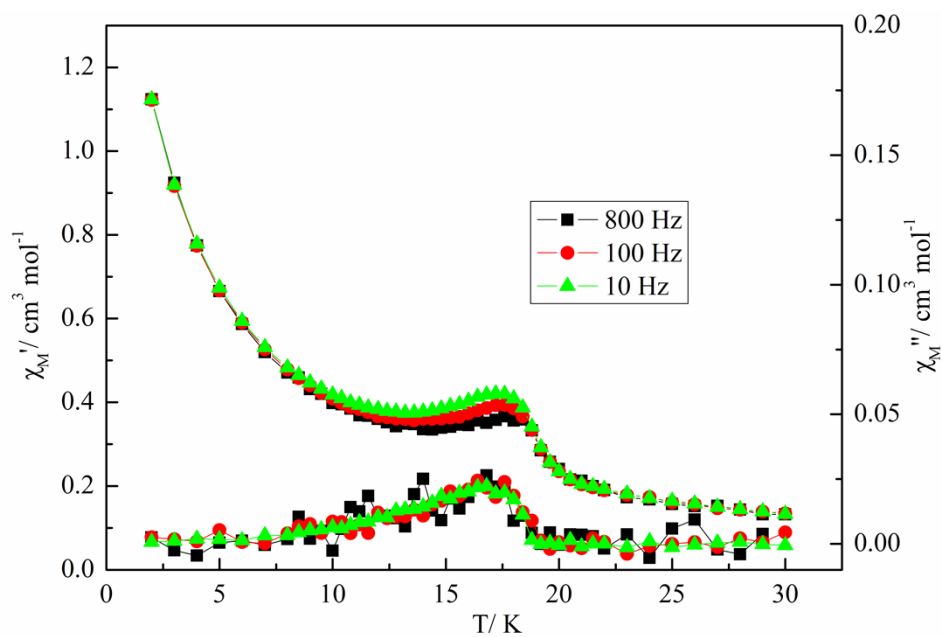

Fig. S4 Temperature dependence of ac susceptibility at various frequencies of 2.

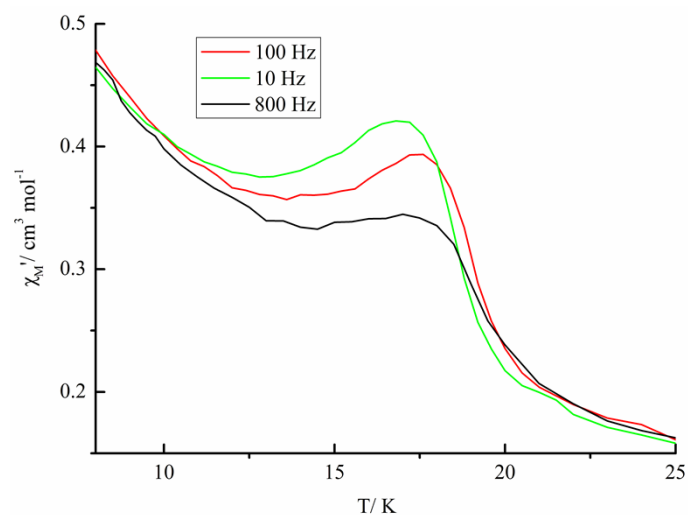

**Fig. S4'** The  $\chi_M'$  of ac susceptibility at various frequencies of **2**.

## Field dependence of magnetization and the hysteresis loop

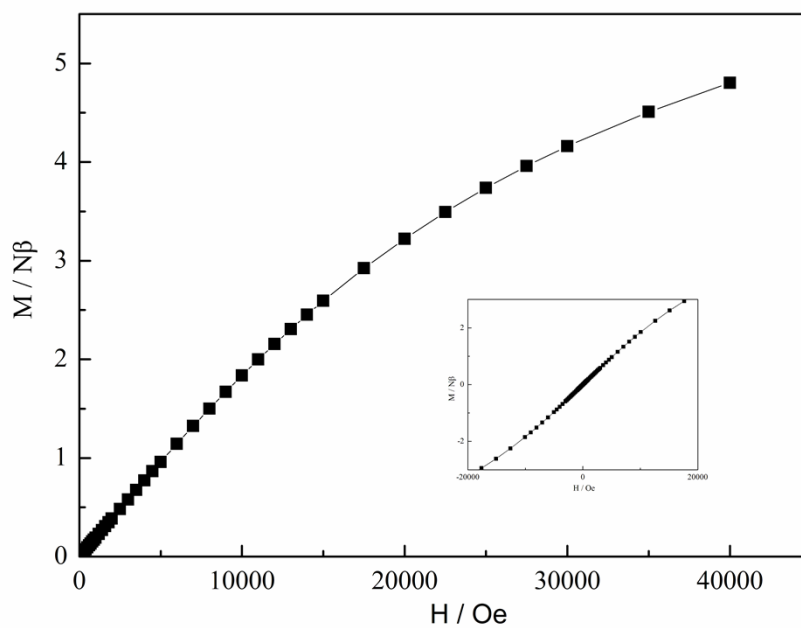

**Fig. S5.** Field dependence of magnetization and the hysteresis loop at 2 K (inset) for **2**.
